# Supplementary material for: Relationship of County Opioid Epidemic Severity to Changes in Access to Substance Use Disorder Treatment, 2009–2017
Source: Atypon-hosted journal article supplement (doi:10.1176/appi.ps.201900150), 2019-10-02
Supplement: appi.ps.201900150.ds001.pdf [file appi.ps.201900150.ds001.pdf]

## Appendix

Appendix Table 1: Summary Statistics by Terciles of Opioid Problem Severity, Unadjusted for Population Size

|                                               | All Counties     |       | Low-Severity Counties |       | Moderate-Severity Counties |       | High-Severity Counties |       | ANOVA Results    |
|-----------------------------------------------|------------------|-------|-----------------------|-------|----------------------------|-------|------------------------|-------|------------------|
|                                               | <i>N</i> =28270  |       | <i>N</i> =9422        |       | <i>N</i> =9422             |       | <i>N</i> =9426         |       | <i>Low-Mod./</i> |
|                                               | mean             | sd    | mean                  | sd    | mean                       | sd    | mean                   | sd    | <i>Low-High/</i> |
|                                               | <i>Mod.-High</i> |       |                       |       |                            |       |                        |       |                  |
| <i>Dependent Variables:</i>                   |                  |       |                       |       |                            |       |                        |       |                  |
| Progs./100,000 Pop.                           | 4.27             | 6.81  | 3.90                  | 8.58  | 4.22                       | 5.68  | 4.68                   | 5.76  | **/**/**         |
| Miles to Nearest Prog.                        | 10.59            | 16.89 | 17.21                 | 20.34 | 7.82                       | 13.91 | 6.73                   | 13.49 | **/**/**         |
| Progs./100,000 Pop., Meth./Bup.               | .59              | 1.96  | .39                   | 2.28  | .59                        | 1.49  | .78                    | 2.02  | **/**/**         |
| Miles to Nearest Prog., Meth./Bup.            | 35.07            | 45.55 | 47.33                 | 56.09 | 30.05                      | 40.57 | 27.84                  | 34.72 | **/**/**         |
| Progs./100,000 Pop., Medicaid                 | 3.09             | 6.11  | 2.92                  | 7.84  | 3.03                       | 5.08  | 3.30                   | 4.98  | -/**/**          |
| Miles to Nearest Prog., Medicaid              | 13.66            | 19.19 | 20.68                 | 22.10 | 10.61                      | 16.71 | 9.69                   | 16.22 | **/**/**         |
| Progs./100,000 Pop., Meth/Bup. & Medicaid     | .40              | 1.74  | .30                   | 2.15  | .40                        | 1.30  | .50                    | 1.64  | **/**/**         |
| Miles to Nearest Prog., Meth./Bup. & Medicaid | 45.30            | 49.76 | 58.44                 | 59.87 | 39.68                      | 45.20 | 37.79                  | 39.25 | **/**/**         |
| <i>Opioid Problem Controls:</i>               |                  |       |                       |       |                            |       |                        |       |                  |
| Drug-Related Mortality, per 10,000 pop.       | 1.18             | 1.13  | .65                   | .92   | 1.09                       | .84   | 1.82                   | 1.26  | **/**/**         |
| Opioid Prescribing, per 100 pop.              | 86.61            | 43.85 | 51.74                 | 24.87 | 83.86                      | 26.23 | 124.60                 | 42.66 | **/**/**         |
| Drug Arrests, per 10,000 pop.                 | 40.24            | 29.87 | 33.53                 | 29.12 | 41.16                      | 27.86 | 46.09                  | 31.24 | **/**/**         |
| <i>State Policy Controls:</i>                 |                  |       |                       |       |                            |       |                        |       |                  |
| Expanded Medicaid                             | .21              | .40   | .19                   | .39   | .21                        | .41   | .22                    | .41   | **/**/-          |
| Optional PDMP                                 | .78              | .41   | .73                   | .43   | .76                        | .41   | .84                    | .36   | **/**/**         |
| Mandatory PDMP                                | .09              | .28   | .05                   | .20   | .08                        | .25   | .15                    | .35   | **/**/**         |
| Pain Clinic Law                               | .19              | .38   | .17                   | .37   | .17                        | .37   | .22                    | .40   | -/**/**          |
| Parity Law                                    | .83              | .37   | .81                   | .39   | .83                        | .38   | .86                    | .34   | **/**/**         |
| Naloxone Standing Order                       | .29              | .43   | .26                   | .41   | .28                        | .43   | .33                    | .44   | **/**/**         |
| SABG Funds Per Capita (2017\$)                | 5.57             | 1.04  | 5.66                  | 1.19  | 5.56                       | .98   | 5.48                   | .91   | **/**/**         |
| <i>Demographic Controls:</i>                  |                  |       |                       |       |                            |       |                        |       |                  |
| Population, in 100,000s                       | 1.01             | 3.23  | .75                   | 4.06  | 1.34                       | 3.35  | .93                    | 1.82  | **/**/**         |
| Percent Rural                                 | 58.64            | 31.50 | 71.45                 | 30.54 | 51.64                      | 30.54 | 52.82                  | 29.40 | **/**/**         |
| Percent White                                 | 77.45            | 19.98 | 76.74                 | 23.31 | 75.67                      | 19.26 | 79.93                  | 16.55 | **/**/**         |

|                                |       |       |       |       |       |       |       |       |          |
|--------------------------------|-------|-------|-------|-------|-------|-------|-------|-------|----------|
| Percent Black                  | 8.87  | 14.38 | 7.48  | 14.91 | 10.23 | 15.06 | 8.90  | 12.93 | **/**/** |
| Percent Hispanic               | 8.83  | 13.46 | 10.40 | 16.80 | 9.20  | 12.43 | 6.90  | 10.00 | **/**/** |
| Percent Asian                  | 1.29  | 2.65  | 1.26  | 3.35  | 1.58  | 2.76  | 1.03  | 1.44  | **/**/** |
| Percent Other Race             | 3.56  | 8.13  | 4.13  | 11.04 | 3.31  | 6.70  | 3.25  | 5.57  | **/**/-  |
| Less Than High School          | 15.51 | 7.05  | 15.20 | 7.98  | 14.87 | 6.65  | 16.48 | 6.29  | **/**/** |
| High School Graduate/GED       | 35.03 | 7.02  | 35.19 | 7.22  | 34.18 | 7.47  | 35.72 | 6.23  | **/**/** |
| Some College/Associate's Deg.  | 29.60 | 5.35  | 29.86 | 5.61  | 29.70 | 5.01  | 29.24 | 5.38  | +/**/**  |
| Bachelor's Deg. or Higher      | 19.86 | 8.91  | 19.76 | 9.42  | 21.25 | 9.69  | 18.57 | 7.19  | **/**/** |
| <i>Economic Controls:</i>      |       |       |       |       |       |       |       |       |          |
| Median Income, 1,000s (2017\$) | 49.02 | 12.85 | 50.70 | 14.21 | 51.01 | 13.29 | 45.35 | 9.82  | -/**/**  |
| Unemployment Rate              | 7.12  | 3.08  | 6.36  | 3.10  | 7.22  | 3.02  | 7.77  | 2.95  | **/**/** |
| Poverty Rate                   | 16.57 | 6.46  | 15.50 | 7.19  | 16.09 | 6.18  | 18.11 | 5.61  | **/**/** |
| Physicians per 1,000 Pop.      | 1.36  | 1.69  | .94   | 1.39  | 1.51  | 1.60  | 1.62  | 1.96  | **/**/** |

*Source: Authors' analysis of all substance use disorder treatment programs listed in the U.S. Substance Abuse and Mental Health Services Administration's (SAMHSA) National Directory of Drug and Alcohol Abuse Treatment Facilities (derived from the National Survey of Substance Abuse Treatment Services (NSSATS)), 2009-2017.*

*Notes: Progs. = Programs; Meth. = Methadone; Bup. = Buprenorphine; Pop. = Population; PDMP = Prescription Drug Monitoring Program; SABG = Substance Abuse Prevention and Treatment Block Grant; Deg. = Degree*

Standard deviations to the right

Statistical significance determined using ANOVA and Tukey's Multiple Comparison Test: Low-to-Moderate/Low-to-High/Moderate-to-High - . p,  $\hat{a}$ •0.1, + p<0.1,

\* p<0.05, \*\* p<0.01

**Appendix 2: Coefficients from Logistic Regressions Estimating the Relationship between County Opioid Problem Severity and Any Substance Use Disorder Treatment Programs Available in the County**

|                                | All Progs.       |     |      | Meth./Bup.       |     |      | Medicaid         |     |       | Meth./Bup. & Medicaid |     |      |
|--------------------------------|------------------|-----|------|------------------|-----|------|------------------|-----|-------|-----------------------|-----|------|
|                                | b                | se  | p    | b                | se  | p    | b                | se  | p     | b                     | se  | p    |
| <i>Opioid Severity:</i>        |                  |     |      |                  |     |      |                  |     |       |                       |     |      |
| Low                            | <i>Ref. Cat.</i> |     |      | <i>Ref. Cat.</i> |     |      | <i>Ref. Cat.</i> |     |       | <i>Ref. Cat.</i>      |     |      |
| Moderate                       | .17**            | .06 | <.01 | .48**            | .10 | <.01 | .34**            | .06 | <.01  | .56**                 | .11 | <.01 |
| High                           | .18*             | .08 | .02  | .79**            | .13 | <.01 | .29**            | .07 | <.01  | .78**                 | .13 | <.01 |
| <i>Year Fixed Effects:</i>     |                  |     |      |                  |     |      |                  |     |       |                       |     |      |
| 2009                           | <i>Ref. Cat.</i> |     |      | <i>Ref. Cat.</i> |     |      | <i>Ref. Cat.</i> |     |       | <i>Ref. Cat.</i>      |     |      |
| 2010                           | -.07*            | .03 | .04  | .13**            | .05 | .01  | -.02             | .03 | .49   | .13*                  | .05 | .01  |
| 2011                           | -.15             | .09 | .11  | .00              | .12 | .99  | .12              | .08 | .16   | -.05                  | .13 | .71  |
| 2012                           | -.03             | .10 | .80  | .23+             | .13 | .08  | .31**            | .09 | <.01  | .26+                  | .14 | .05  |
| 2013                           | -.06             | .12 | .60  | .40**            | .15 | .01  | .33**            | .11 | <.01  | .50**                 | .15 | <.01 |
| 2014                           | .13              | .13 | .32  | .51**            | .17 | <.01 | .71**            | .13 | <.01  | .67**                 | .18 | <.01 |
| 2015                           | .14              | .15 | .34  | .61**            | .19 | <.01 | .81**            | .14 | <.01  | .83**                 | .20 | <.01 |
| 2016                           | .13              | .16 | .43  | .62**            | .21 | <.01 | .83**            | .15 | <.01  | .88**                 | .21 | <.01 |
| 2017                           | .13              | .17 | .47  | .36              | .23 | .13  | .79**            | .16 | <.01  | .53*                  | .24 | .03  |
| <i>State Policy Controls:</i>  |                  |     |      |                  |     |      |                  |     |       |                       |     |      |
| Expanded Medicaid              | .45**            | .08 | <.01 | .07              | .10 | .49  | .05              | .08 | .52   | .01                   | .10 | .92  |
| Optional PDMP                  | .22**            | .08 | .01  | -.29**           | .11 | .01  | .13+             | .08 | .09   | -.19+                 | .11 | .07  |
| Mandatory PDMP                 | .62**            | .15 | <.01 | .26+             | .13 | .06  | .74**            | .13 | <.01  | .48**                 | .13 | <.01 |
| Pain Clinic Law                | -.75**           | .11 | <.01 | -.53**           | .13 | <.01 | -.93**           | .10 | <.01  | -1.35**               | .15 | <.01 |
| Parity Law                     | .14              | .10 | .18  | .34*             | .14 | .01  | -.16+            | .09 | .08   | .52**                 | .14 | <.01 |
| Naloxone Standing Order        | .30**            | .09 | <.01 | .31**            | .11 | <.01 | .22*             | .09 | .01   | .33**                 | .11 | <.01 |
| SABG Funds Per Capita (2017\$) | -.03             | .04 | .44  | .22**            | .05 | <.01 | .00              | .04 | 1<.01 | .28**                 | .05 | <.01 |
| <i>Demographic Controls:</i>   |                  |     |      |                  |     |      |                  |     |       |                       |     |      |
| Population, in 100,000s        | 3.47**           | .32 | <.01 | 1.70**           | .15 | <.01 | 1.76**           | .21 | <.01  | .88**                 | .08 | <.01 |
| Percent Rural                  | -.02**           | .00 | <.01 | -.01**           | .00 | <.01 | -.02**           | .00 | <.01  | -.02**                | .00 | <.01 |
| Percent White                  | <i>Ref. Cat.</i> |     |      | <i>Ref. Cat.</i> |     |      | <i>Ref. Cat.</i> |     |       | <i>Ref. Cat.</i>      |     |      |
| Percent Black                  | -.02**           | .00 | <.01 | -.00             | .00 | .36  | -.02**           | .00 | <.01  | -.01*                 | .01 | .01  |
| Percent Hispanic               | -.01             | .00 | .13  | -.01             | .01 | .34  | -.00             | .00 | .33   | -.00                  | .01 | .70  |
| Percent Asian                  | .06*             | .03 | .03  | -.03             | .05 | .53  | .01              | .05 | .86   | -.07                  | .05 | .15  |
| Percent Other Race             | .01+             | .01 | .07  | -.01             | .01 | .12  | .00              | .00 | .78   | -.01*                 | .01 | .04  |
| Less Than High School          | <i>Ref. Cat.</i> |     |      | <i>Ref. Cat.</i> |     |      | <i>Ref. Cat.</i> |     |       | <i>Ref. Cat.</i>      |     |      |
| High School Graduate/GED       | .05**            | .01 | <.01 | .03+             | .02 | .06  | .07**            | .01 | <.01  | .07**                 | .02 | <.01 |
| Some College/Associate's Deg.  | .06**            | .01 | <.01 | .03+             | .01 | .05  | .06**            | .01 | <.01  | .04**                 | .01 | .01  |
| Bachelor's Deg. or Higher      | .03**            | .01 | .01  | .03              | .02 | .14  | .04**            | .01 | <.01  | .05**                 | .02 | <.01 |
| <i>Economic Controls:</i>      |                  |     |      |                  |     |      |                  |     |       |                       |     |      |

|                                |         |     |      |         |      |      |          |     |      |          |      |      |
|--------------------------------|---------|-----|------|---------|------|------|----------|-----|------|----------|------|------|
| Median Income, 1,000s (2017)\$ | -.01+   | .01 | .08  | .01     | .01  | .54  | -.01     | .01 | .35  | .02*     | .01  | .04  |
| Unemployment Rate              | .09**   | .02 | <.01 | .04*    | .02  | .02  | .09**    | .02 | <.01 | .09**    | .02  | <.01 |
| Poverty Rate                   | .04**   | .01 | <.01 | .03*    | .01  | .02  | .04**    | .01 | <.01 | .04**    | .01  | <.01 |
| Physicians per 1,000 Pop.      | .37**   | .11 | <.01 | .20     | .15  | .18  | .31**    | .08 | <.01 | .16      | .10  | .12  |
| Constant                       | -4.90** | .99 | <.01 | -7.52** | 1.46 | <.01 | -6.31**  | .95 | <.01 | -11.21** | 1.48 | <.01 |
| Observations                   | 28,270  |     |      | 28,270  |      |      | 28,270   |     |      | 28,270   |      |      |
| Pseudo R-Squared               | .348    |     |      | .433    |      |      | .295     |     |      | .394     |      |      |
| Model Chi-Square               | 887.696 |     |      | 950.756 |      |      | 1011.261 |     |      | 1227.212 |      |      |
| Degrees of Freedom             | 30      |     |      | 30      |      |      | 30       |     |      | 30       |      |      |

*Source: Authors' analysis of all substance use disorder treatment programs listed in the U.S. Substance Abuse and Mental Health Services Administration's (SAMHSA) National Directory of Drug and Alcohol Abuse Treatment Facilities (derived from the National Survey of Substance Abuse Treatment Services (NSSATS)), 2009-2017.*

*Notes: Progs. = Programs; Meth. = Methadone; Bup. = Buprenorphine; PDMP = Prescription Drug Monitoring Program; SABG = Substance Abuse Prevention and Treatment Block Grant; Pop. = Population*

*All models conducted in Stata 15 using the logit command with standard errors clustered at the county-level.*

+ p<0.1, \* p<0.05, \*\* p<0.01

**Appendix 3: Marginal Effects from Logistic Regressions Estimating the Relationship between County Opioid Problem Severity and Any Substance Use Disorder Treatment Programs Available in the County**

|                                | All Progs.       |     |      | Meth./Bup.       |     |      | Medicaid         |     |      | Meth./Bup. & Medicaid |     |      |
|--------------------------------|------------------|-----|------|------------------|-----|------|------------------|-----|------|-----------------------|-----|------|
|                                | b                | se  | p    | b                | se  | p    | b                | se  | p    | b                     | se  | p    |
| <i>Opioid Severity:</i>        |                  |     |      |                  |     |      |                  |     |      |                       |     |      |
| Low                            | <i>Ref. Cat.</i> |     |      | <i>Ref. Cat.</i> |     |      | <i>Ref. Cat.</i> |     |      | <i>Ref. Cat.</i>      |     |      |
| Moderate                       | .03**            | .01 | .01  | .04**            | .01 | <.01 | .06**            | .01 | <.01 | .04**                 | .01 | <.01 |
| High                           | .03*             | .01 | .02  | .07**            | .01 | <.01 | .05**            | .01 | <.01 | .07**                 | .01 | <.01 |
| <i>Year Fixed Effects:</i>     |                  |     |      |                  |     |      |                  |     |      |                       |     |      |
| 2009                           | <i>Ref. Cat.</i> |     |      | <i>Ref. Cat.</i> |     |      | <i>Ref. Cat.</i> |     |      | <i>Ref. Cat.</i>      |     |      |
| 2010                           | -.01*            | .00 | .03  | .01**            | .00 | .01  | -.00             | .01 | .50  | .01*                  | .00 | .01  |
| 2011                           | -.02             | .01 | .10  | .00              | .01 | .99  | .02              | .01 | .16  | -.00                  | .01 | .71  |
| 2012                           | -.00             | .01 | .80  | .02+             | .01 | .06  | .05**            | .01 | <.01 | .02*                  | .01 | .04  |
| 2013                           | -.01             | .02 | .60  | .04**            | .01 | <.01 | .05**            | .02 | <.01 | .04**                 | .01 | <.01 |
| 2014                           | .02              | .02 | .33  | .05**            | .02 | <.01 | .12**            | .02 | <.01 | .06**                 | .01 | <.01 |
| 2015                           | .02              | .02 | .34  | .06**            | .02 | <.01 | .13**            | .02 | <.01 | .07**                 | .02 | <.01 |
| 2016                           | .02              | .02 | .43  | .06**            | .02 | <.01 | .14**            | .02 | <.01 | .08**                 | .02 | <.01 |
| 2017                           | .02              | .02 | .47  | .03              | .02 | .13  | .13**            | .03 | <.01 | .04*                  | .02 | .03  |
| <i>State Policy Controls:</i>  |                  |     |      |                  |     |      |                  |     |      |                       |     |      |
| Expanded Medicaid              | .06**            | .01 | <.01 | .01              | .01 | .49  | .01              | .01 | .52  | .00                   | .01 | .92  |
| Optional PDMP                  | .03**            | .01 | .01  | -.03**           | .01 | .01  | .02+             | .01 | .09  | -.02+                 | .01 | .07  |
| Mandatory PDMP                 | .09**            | .02 | <.01 | .02+             | .01 | .06  | .12**            | .02 | <.01 | .04**                 | .01 | <.01 |
| Pain Clinic Law                | -.11**           | .02 | <.01 | -.05**           | .01 | <.01 | -.15**           | .02 | <.01 | -.12**                | .01 | <.01 |
| Parity Law                     | .02              | .01 | .17  | .03*             | .01 | .01  | -.03+            | .01 | .08  | .05**                 | .01 | <.01 |
| Naloxone Standing Order        | .04**            | .01 | <.01 | .03**            | .01 | <.01 | .04*             | .01 | .01  | .03**                 | .01 | <.01 |
| SABG Funds Per Capita (2017\$) | -.00             | .01 | .44  | .02**            | .00 | <.01 | .00              | .01 | 1.00 | .02**                 | .00 | <.01 |
| <i>Demographic Controls:</i>   |                  |     |      |                  |     |      |                  |     |      |                       |     |      |
| Population, in 100,000s        | .50**            | .04 | <.01 | .16**            | .01 | <.01 | .29**            | .03 | <.01 | .08**                 | .01 | <.01 |
| Percent Rural                  | -.00**           | .00 | <.01 | -.00**           | .00 | <.01 | -.00**           | .00 | <.01 | -.00**                | .00 | <.01 |
| Percent White                  | <i>Ref. Cat.</i> |     |      | <i>Ref. Cat.</i> |     |      | <i>Ref. Cat.</i> |     |      | <i>Ref. Cat.</i>      |     |      |
| Percent Black                  | -.00**           | .00 | <.01 | -.00             | .00 | .36  | -.00**           | .00 | <.01 | -.00*                 | .00 | .01  |
| Percent Hispanic               | -.00             | .00 | .13  | -.00             | .00 | .34  | -.00             | .00 | .33  | -.00                  | .00 | .70  |
| Percent Asian                  | .01*             | .00 | .03  | -.00             | .01 | .53  | .00              | .01 | .86  | -.01                  | .00 | .15  |
| Percent Other Race             | .00+             | .00 | .07  | -.00             | .00 | .12  | .00              | .00 | .78  | -.00*                 | .00 | .04  |
| Less Than High School          | <i>Ref. Cat.</i> |     |      | <i>Ref. Cat.</i> |     |      | <i>Ref. Cat.</i> |     |      | <i>Ref. Cat.</i>      |     |      |
| High School Graduate/GED       | .01**            | .00 | <.01 | .00+             | .00 | .06  | .01**            | .00 | <.01 | .01**                 | .00 | <.01 |
| Some College/Associate's Deg.  | .01**            | .00 | <.01 | .00+             | .00 | .05  | .01**            | .00 | <.01 | .00**                 | .00 | .01  |
| Bachelor's Deg. or Higher      | .00**            | .00 | .01  | .00              | .00 | .14  | .01**            | .00 | <.01 | .00**                 | .00 | <.01 |

*Economic Controls:*

|                                |        |     |      |        |     |     |        |     |      |        |     |      |
|--------------------------------|--------|-----|------|--------|-----|-----|--------|-----|------|--------|-----|------|
| Median Income, 1,000s (2017)\$ | -.00+  | .00 | .08  | .00    | .00 | .54 | -.00   | .00 | .35  | .00*   | .00 | .04  |
| Unemployment Rate              | .01**  | .00 | <.01 | .00*   | .00 | .02 | .01**  | .00 | <.01 | .01**  | .00 | <.01 |
| Poverty Rate                   | .01**  | .00 | <.01 | .00*   | .00 | .02 | .01**  | .00 | <.01 | .00**  | .00 | <.01 |
| Physicians per 1,000 Pop.      | .05**  | .02 | <.01 | .02    | .01 | .18 | .05**  | .01 | <.01 | .01    | .01 | .12  |
| Observations                   | 28,270 |     |      | 28,270 |     |     | 28,270 |     |      | 28,270 |     |      |

*Source: Authors' analysis of all substance use disorder treatment programs listed in the U.S. Substance Abuse and Mental Health Services Administration's (SAMHSA) National Directory of Drug and Alcohol Abuse Treatment Facilities (derived from the National Survey of Substance Abuse Treatment Services (NSSATS)), 2009-2017.*

*Notes: Progs. = Programs; Meth. = Methadone; Bup. = Buprenorphine; PDMP = Prescription Drug Monitoring Program; SABG = Substance Abuse Prevention and Treatment Block Grant; Pop. = Population*

*All models conducted in Stata 15 using the margins command following logistic regression with standard errors clustered at the county-level.*

+ p<0.1, \* p<0.05, \*\* p<0.01

**Appendix 4: Coefficients from OLS Regressions Estimating the Relationship between County Opioid Problem Severity and the Log Number of Substance Use Disorder Treatment Programs Available per 100,000 Population (Conditional on Any)**

|                                | All Progs.       |     |      | Meth./Bup.       |     |      | Medicaid         |     |      | Meth./Bup. & Medicaid |     |      |
|--------------------------------|------------------|-----|------|------------------|-----|------|------------------|-----|------|-----------------------|-----|------|
|                                | b                | se  | p    | b                | se  | p    | b                | se  | p    | b                     | se  | p    |
| <i>Opioid Severity:</i>        |                  |     |      |                  |     |      |                  |     |      |                       |     |      |
| Low                            | <i>Ref. Cat.</i> |     |      | <i>Ref. Cat.</i> |     |      | <i>Ref. Cat.</i> |     |      | <i>Ref. Cat.</i>      |     |      |
| Moderate                       | -.08**           | .03 | <.01 | -.15**           | .05 | <.01 | -.13**           | .03 | <.01 | -.18**                | .06 | <.01 |
| High                           | -.07*            | .03 | .03  | -.06             | .06 | .26  | -.13**           | .03 | <.01 | -.11                  | .07 | .11  |
| <i>Year Fixed Effects:</i>     |                  |     |      |                  |     |      |                  |     |      |                       |     |      |
| 2009                           | <i>Ref. Cat.</i> |     |      | <i>Ref. Cat.</i> |     |      | <i>Ref. Cat.</i> |     |      | <i>Ref. Cat.</i>      |     |      |
| 2010                           | -.03**           | .01 | <.01 | .10**            | .02 | <.01 | -.01             | .01 | .52  | .12**                 | .03 | <.01 |
| 2011                           | -.18**           | .03 | <.01 | -.01             | .05 | .79  | -.08*            | .03 | .02  | .05                   | .05 | .34  |
| 2012                           | -.18**           | .03 | <.01 | .01              | .05 | .79  | -.08*            | .04 | .04  | .09                   | .06 | .13  |
| 2013                           | -.17**           | .03 | <.01 | .08              | .05 | .14  | -.04             | .04 | .32  | .13*                  | .07 | .05  |
| 2014                           | -.25**           | .04 | <.01 | .11              | .07 | .10  | -.07             | .05 | .13  | .20*                  | .08 | .02  |
| 2015                           | -.27**           | .05 | <.01 | .13+             | .08 | .08  | -.06             | .05 | .27  | .23*                  | .10 | .02  |
| 2016                           | -.29**           | .05 | <.01 | .17+             | .09 | .05  | -.03             | .06 | .67  | .32**                 | .11 | <.01 |
| 2017                           | -.34**           | .06 | <.01 | .08              | .09 | .40  | -.08             | .07 | .24  | .25*                  | .11 | .03  |
| <i>State Policy Controls:</i>  |                  |     |      |                  |     |      |                  |     |      |                       |     |      |
| Expanded Medicaid              | .18**            | .03 | <.01 | .03              | .04 | .50  | .11**            | .03 | <.01 | .02                   | .05 | .73  |
| Optional PDMP                  | -.06*            | .03 | .02  | -.04             | .04 | .39  | -.10**           | .03 | <.01 | -.01                  | .05 | .85  |
| Mandatory PDMP                 | -.09*            | .04 | .02  | .02              | .05 | .74  | -.02             | .04 | .65  | .08                   | .06 | .17  |
| Pain Clinic Law                | -.21**           | .04 | <.01 | -.38**           | .05 | <.01 | -.39**           | .04 | <.01 | -.56**                | .06 | <.01 |
| Parity Law                     | .16**            | .03 | <.01 | .20**            | .05 | <.01 | .07+             | .04 | .06  | .13*                  | .06 | .04  |
| Naloxone Standing Order        | .02              | .03 | .46  | -.04             | .05 | .39  | -.07+            | .03 | .06  | -.14*                 | .06 | .02  |
| SABG Funds Per Capita (2017\$) | .05**            | .02 | <.01 | .08**            | .02 | <.01 | .04*             | .02 | .01  | .07**                 | .02 | <.01 |
| <i>Demographic Controls:</i>   |                  |     |      |                  |     |      |                  |     |      |                       |     |      |
| Population, in 100,000s        | -.01*            | .01 | .02  | -.01*            | .00 | .01  | -.02**           | .01 | <.01 | -.02**                | .01 | .01  |
| Percent Rural                  | .01**            | .00 | <.01 | .02**            | .00 | <.01 | .02**            | .00 | <.01 | .02**                 | .00 | <.01 |
| Percent White                  | <i>Ref. Cat.</i> |     |      | <i>Ref. Cat.</i> |     |      | <i>Ref. Cat.</i> |     |      | <i>Ref. Cat.</i>      |     |      |
| Percent Black                  | -.01**           | .00 | <.01 | .00              | .00 | .94  | -.01**           | .00 | <.01 | -.00                  | .00 | .60  |
| Percent Hispanic               | .01**            | .00 | <.01 | .00              | .00 | .88  | .01**            | .00 | <.01 | .00                   | .00 | .79  |
| Percent Asian                  | .02**            | .01 | <.01 | -.00             | .01 | .94  | .00              | .01 | .83  | -.01+                 | .01 | .10  |
| Percent Other Race             | .01**            | .00 | <.01 | .00              | .00 | .82  | .01**            | .00 | <.01 | .00                   | .00 | .61  |
| Less Than High School          | <i>Ref. Cat.</i> |     |      | <i>Ref. Cat.</i> |     |      | <i>Ref. Cat.</i> |     |      | <i>Ref. Cat.</i>      |     |      |
| High School Graduate/GED       | .02**            | .00 | <.01 | .00              | .01 | .96  | .02**            | .01 | <.01 | .01                   | .01 | .57  |
| Some College/Associate's Deg.  | .03**            | .00 | <.01 | -.00             | .01 | .73  | .03**            | .00 | <.01 | -.01                  | .01 | .43  |

|                                |                  |     |      |                  |     |      |                  |     |      |                  |     |      |
|--------------------------------|------------------|-----|------|------------------|-----|------|------------------|-----|------|------------------|-----|------|
| Bachelor's Deg. or Higher      | .01**            | .00 | <.01 | -.01             | .01 | .22  | .02**            | .00 | <.01 | -.01+            | .01 | .09  |
| <i>Economic Controls:</i>      | <i>Ref. Cat.</i> |     |      |
| Median Income, 1,000s (2017)\$ | -.01**           | .00 | <.01 | .00              | .00 | .93  | -.01**           | .00 | <.01 | .01              | .00 | .21  |
| Unemployment Rate              | -.03**           | .01 | <.01 | -.03**           | .01 | <.01 | -.04**           | .01 | <.01 | -.03**           | .01 | .01  |
| Poverty Rate                   | .02**            | .00 | <.01 | .02*             | .01 | .03  | .01*             | .01 | .01  | .02*             | .01 | .02  |
| Physicians per 1,000 Pop.      | .03**            | .01 | .01  | .06**            | .02 | <.01 | .03**            | .01 | .01  | .07**            | .02 | <.01 |
| Constant                       | -.40             | .40 | .32  | -.56             | .85 | .51  | -.67             | .47 | .16  | -1.07            | .88 | .22  |
| Observations                   | 18,001           |     |      | 7,030            |     |      | 15,880           |     |      | 5,332            |     |      |
| R-Squared                      | .307             |     |      | .442             |     |      | .440             |     |      | .548             |     |      |
| F-Statistic                    | 38.171           |     |      | 43.744           |     |      | 63.323           |     |      | 49.119           |     |      |
| Degrees of Freedom             | 2,369            |     |      | 1,128            |     |      | 2,218            |     |      | 955              |     |      |

Source: Authors' analysis of all substance use disorder treatment programs listed in the U.S. Substance Abuse and Mental Health Services Administration's (SAMHSA) National Directory of Drug and Alcohol Abuse Treatment Facilities (derived from the National Survey of Substance Abuse Treatment Services (NSSATS)), 2009-2017.

Notes: Progs. = Programs; Meth. = Methadone; Bup. = Buprenorphine; PDMP = Prescription Drug Monitoring Program; SABG = Substance Abuse Prevention and Treatment Block Grant; Pop. = Population

All models conducted in Stata 15 using the reg command with standard errors clustered at the county-level.

+ p<0.1, \* p<0.05, \*\* p<0.01



**Appendix 5: Coefficients from OLS Regressions Estimating the Relationship between County Opioid Problem Severity and the Log Distance (in Miles) to the Nearest Substance Use Disorder Treatment Program (Conditional on None)**

|                                | All Progs.       |     |      | Meth./Bup.       |     |      | Medicaid         |     |      | Meth./Bup. & Medicaid |     |      |
|--------------------------------|------------------|-----|------|------------------|-----|------|------------------|-----|------|-----------------------|-----|------|
|                                | b                | se  | p    | b                | se  | p    | b                | se  | p    | b                     | se  | p    |
| <i>Opioid Severity:</i>        |                  |     |      |                  |     |      |                  |     |      |                       |     |      |
| Low                            | <i>Ref. Cat.</i> |     |      | <i>Ref. Cat.</i> |     |      | <i>Ref. Cat.</i> |     |      | <i>Ref. Cat.</i>      |     |      |
| Moderate                       | -.00             | .01 | .92  | -.00             | .01 | .87  | .01              | .01 | .42  | -.02                  | .01 | .12  |
| High                           | .03+             | .02 | .09  | .01              | .02 | .51  | .03              | .02 | .11  | -.01                  | .02 | .72  |
| <i>Year Fixed Effects:</i>     |                  |     |      |                  |     |      |                  |     |      |                       |     |      |
| 2009                           | <i>Ref. Cat.</i> |     |      | <i>Ref. Cat.</i> |     |      | <i>Ref. Cat.</i> |     |      | <i>Ref. Cat.</i>      |     |      |
| 2010                           | -.00             | .01 | .66  | -.04**           | .01 | <.01 | -.02*            | .01 | .03  | -.08**                | .01 | <.01 |
| 2011                           | -.04+            | .02 | .08  | -.10**           | .02 | <.01 | -.10**           | .02 | <.01 | -.16**                | .02 | <.01 |
| 2012                           | -.05*            | .02 | .04  | -.16**           | .02 | <.01 | -.13**           | .02 | <.01 | -.24**                | .02 | <.01 |
| 2013                           | -.01             | .03 | .62  | -.16**           | .02 | <.01 | -.09**           | .03 | <.01 | -.24**                | .03 | <.01 |
| 2014                           | -.07*            | .03 | .03  | -.24**           | .03 | <.01 | -.19**           | .03 | <.01 | -.37**                | .03 | <.01 |
| 2015                           | -.02             | .04 | .56  | -.25**           | .03 | <.01 | -.14**           | .04 | <.01 | -.40**                | .03 | <.01 |
| 2016                           | .01              | .04 | .81  | -.22**           | .04 | <.01 | -.11**           | .04 | <.01 | -.41**                | .04 | <.01 |
| 2017                           | -.08*            | .04 | .05  | -.39**           | .04 | <.01 | -.21**           | .04 | <.01 | -.57**                | .04 | <.01 |
| <i>State Policy Controls:</i>  |                  |     |      |                  |     |      |                  |     |      |                       |     |      |
| Expanded Medicaid              | .08**            | .02 | <.01 | .06**            | .02 | <.01 | .14**            | .02 | <.01 | .09**                 | .02 | <.01 |
| Optional PDMP                  | -.08**           | .02 | <.01 | -.06**           | .02 | <.01 | -.07**           | .02 | <.01 | -.14**                | .02 | <.01 |
| Mandatory PDMP                 | -.20**           | .03 | <.01 | -.10**           | .02 | <.01 | -.21**           | .03 | <.01 | -.16**                | .02 | <.01 |
| Pain Clinic Law                | .08**            | .03 | <.01 | -.03             | .02 | .20  | .06*             | .02 | .01  | .14**                 | .02 | <.01 |
| Parity Law                     | .04*             | .02 | .04  | .05*             | .02 | .02  | .10**            | .02 | <.01 | .03                   | .02 | .17  |
| Naloxone Standing Order        | -.18**           | .02 | <.01 | -.20**           | .02 | <.01 | -.19**           | .02 | <.01 | -.15**                | .02 | <.01 |
| SABG Funds Per Capita (2017\$) | .10**            | .01 | <.01 | .12**            | .01 | <.01 | .10**            | .01 | <.01 | .10**                 | .01 | <.01 |
| <i>Demographic Controls:</i>   |                  |     |      |                  |     |      |                  |     |      |                       |     |      |
| Population, in 100,000s        | -.14+            | .08 | .06  | -.26**           | .04 | <.01 | -.09+            | .04 | .06  | -.14**                | .02 | <.01 |
| Percent Rural                  | .00*             | .00 | .04  | .00**            | .00 | <.01 | .00*             | .00 | .03  | .00**                 | .00 | <.01 |
| Percent White                  | <i>Ref. Cat.</i> |     |      | <i>Ref. Cat.</i> |     |      | <i>Ref. Cat.</i> |     |      | <i>Ref. Cat.</i>      |     |      |
| Percent Black                  | .00+             | .00 | .07  | .00**            | .00 | <.01 | .00**            | .00 | <.01 | .00**                 | .00 | <.01 |
| Percent Hispanic               | .01**            | .00 | <.01 | .01**            | .00 | <.01 | .01**            | .00 | <.01 | .01**                 | .00 | <.01 |
| Percent Asian                  | -.04             | .04 | .26  | .04**            | .02 | .01  | -.01             | .02 | .55  | .03**                 | .01 | .01  |
| Percent Other Race             | .01**            | .00 | <.01 | .02**            | .00 | <.01 | .01**            | .00 | <.01 | .02**                 | .00 | <.01 |
| Less Than High School          | <i>Ref. Cat.</i> |     |      | <i>Ref. Cat.</i> |     |      | <i>Ref. Cat.</i> |     |      | <i>Ref. Cat.</i>      |     |      |
| High School Graduate/GED       | .01**            | .00 | <.01 | .01**            | .00 | <.01 | .01**            | .00 | <.01 | .01**                 | .00 | .01  |
| Some College/Associate's Deg.  | .02**            | .00 | <.01 | .03**            | .00 | <.01 | .02**            | .00 | <.01 | .03**                 | .00 | <.01 |

|                                |        |     |      |        |     |      |        |     |      |        |     |      |
|--------------------------------|--------|-----|------|--------|-----|------|--------|-----|------|--------|-----|------|
| Bachelor's Deg. or Higher      | .02**  | .00 | <.01 | .02**  | .00 | <.01 | .02**  | .00 | <.01 | .01**  | .00 | <.01 |
| <i>Economic Controls:</i>      |        |     |      |        |     |      |        |     |      |        |     |      |
| Median Income, 1,000s (2017)\$ | -.01** | .00 | <.01 | -.02** | .00 | <.01 | -.01** | .00 | <.01 | -.02** | .00 | <.01 |
| Unemployment Rate              | -.01   | .00 | .13  | -.03** | .00 | <.01 | -.01** | .00 | <.01 | -.04** | .00 | <.01 |
| Poverty Rate                   | -.00   | .00 | .44  | -.01+  | .00 | .05  | -.00   | .00 | .35  | -.01*  | .00 | .02  |
| Physicians per 1,000 Pop.      | -.07*  | .03 | .05  | -.03+  | .02 | .09  | -.05   | .03 | .10  | -.01   | .01 | .26  |
| Constant                       | 1.74** | .25 | <.01 | 2.36** | .23 | <.01 | 2.05** | .24 | <.01 | 3.34** | .23 | <.01 |
| Observations                   | 10,269 |     |      | 21,240 |     |      | 12,390 |     |      | 22,938 |     |      |
| R-Squared                      | .368   |     |      | .374   |     |      | .330   |     |      | .328   |     |      |
| F-Statistic                    | 32.459 |     |      | 69.433 |     |      | 38.817 |     |      | 88.352 |     |      |
| Degrees of Freedom             | 1,597  |     |      | 2,649  |     |      | 1,910  |     |      | 2,824  |     |      |

*Source: Authors' analysis of all substance use disorder treatment programs listed in the U.S. Substance Abuse and Mental Health Services Administration's (SAMHSA) National Directory of Drug and Alcohol Abuse Treatment Facilities (derived from the National Survey of Substance Abuse Treatment Services (NSSATS)), 2009-2017.*

*Notes: Progs. = Programs; Meth. = Methadone; Bup. = Buprenorphine; PDMP = Prescription Drug Monitoring Program; SABG = Substance Abuse Prevention and Treatment Block Grant; Pop. = Population*

*All models conducted in Stata 15 using the reg command with standard errors clustered at the county-level.*

+ p<0.1, \* p<0.05, \*\* p<0.01

**Appendix Table 6: Logistic Regressions and Marginal Effects Estimating the Relationship between County Opioid Problem Severity and Any Substance Use Disorder Treatment Programs Offering Methadone and Buprenorphine in the County**

|                                | Coef. Meth.      |     |      | ME Meth.         |     |      | Coef. Bup.       |     |      | ME Bup.          |     |      |
|--------------------------------|------------------|-----|------|------------------|-----|------|------------------|-----|------|------------------|-----|------|
|                                | b                | se  | p    | me               | se  | p    | b                | se  | p    | me               | se  | p    |
| <i>Opioid Severity:</i>        |                  |     |      |                  |     |      |                  |     |      |                  |     |      |
| Low                            | <i>Ref. Cat.</i> |     |      |
| Moderate                       | 1.05**           | .19 | <.01 | .04**            | .01 | <.01 | .42**            | .10 | <.01 | .04**            | .01 | <.01 |
| High                           | 1.51**           | .21 | <.01 | .07**            | .01 | <.01 | .71**            | .12 | <.01 | .07**            | .01 | <.01 |
| <i>Year Fixed Effects:</i>     |                  |     |      |                  |     |      |                  |     |      |                  |     |      |
| 2009                           | <i>Ref. Cat.</i> |     |      |
| 2010                           | .07              | .05 | .13  | .00              | .00 | .12  | .17**            | .05 | <.01 | .02**            | .00 | <.01 |
| 2011                           | -.13             | .15 | .39  | -.01             | .01 | .41  | -.04             | .12 | .72  | -.00             | .01 | .72  |
| 2012                           | .09              | .16 | .57  | .01              | .01 | .56  | .14              | .13 | .29  | .01              | .01 | .27  |
| 2013                           | .17              | .19 | .36  | .01              | .01 | .35  | .33*             | .15 | .03  | .03*             | .01 | .02  |
| 2014                           | .07              | .23 | .78  | .00              | .01 | .78  | .45**            | .17 | .01  | .04**            | .02 | <.01 |
| 2015                           | .04              | .27 | .89  | .00              | .01 | .89  | .59**            | .19 | <.01 | .06**            | .02 | <.01 |
| 2016                           | -.10             | .30 | .73  | -.01             | .02 | .73  | .65**            | .20 | <.01 | .06**            | .02 | <.01 |
| 2017                           | -.34             | .34 | .32  | -.02             | .02 | .32  | .41+             | .23 | .07  | .04+             | .02 | .07  |
| <i>State Policy Controls:</i>  |                  |     |      |                  |     |      |                  |     |      |                  |     |      |
| Expanded Medicaid              | .19              | .14 | .19  | .01              | .01 | .19  | .07              | .10 | .46  | .01              | .01 | .46  |
| Optional PDMP                  | -.31*            | .14 | .03  | -.02*            | .01 | .03  | -.14             | .10 | .17  | -.01             | .01 | .17  |
| Mandatory PDMP                 | -.87**           | .19 | <.01 | -.05**           | .01 | <.01 | .41**            | .13 | <.01 | .04**            | .01 | <.01 |
| Pain Clinic Law                | -.02             | .17 | .89  | -.00             | .01 | .89  | -.62**           | .13 | <.01 | -.06**           | .01 | <.01 |
| Parity Law                     | .40*             | .18 | .02  | .02*             | .01 | .02  | .43**            | .13 | <.01 | .04**            | .01 | <.01 |
| Naloxone Standing Order        | .67**            | .16 | <.01 | .04**            | .01 | <.01 | .20+             | .11 | .06  | .02+             | .01 | .06  |
| SABG Funds Per Capita (2017\$) | .22*             | .09 | .01  | .01*             | .00 | .01  | .20**            | .05 | <.01 | .02**            | .00 | <.01 |
| <i>Demographic Controls:</i>   |                  |     |      |                  |     |      |                  |     |      |                  |     |      |
| Population, in 100,000s        | 1.26**           | .11 | <.01 | .07**            | .01 | <.01 | 1.08**           | .12 | <.01 | .10**            | .01 | <.01 |
| Percent Rural                  | -.02**           | .00 | <.01 | -.00**           | .00 | <.01 | -.02**           | .00 | <.01 | -.00**           | .00 | <.01 |
| Percent White                  | <i>Ref. Cat.</i> |     |      |
| Percent Black                  | .02*             | .01 | .02  | .00*             | .00 | .02  | -.01             | .00 | .11  | -.00             | .00 | .11  |
| Percent Hispanic               | -.00             | .01 | .87  | -.00             | .00 | .87  | -.01*            | .01 | .02  | -.00*            | .00 | .02  |
| Percent Asian                  | -.06             | .05 | .31  | -.00             | .00 | .31  | -.03             | .05 | .55  | -.00             | .00 | .55  |
| Percent Other Race             | .01              | .01 | .45  | .00              | .00 | .45  | -.01*            | .01 | .01  | -.00*            | .00 | .01  |
| Less Than High School          | <i>Ref. Cat.</i> |     |      |
| High School Graduate/GED       | .03              | .03 | .33  | .00              | .00 | .32  | .04*             | .02 | .03  | .00*             | .00 | .03  |
| Some College/Associate's Deg.  | -.02             | .02 | .26  | -.00             | .00 | .26  | .04**            | .01 | <.01 | .00**            | .00 | <.01 |
| Bachelor's Deg. or Higher      | .03              | .02 | .22  | .00              | .00 | .22  | .04*             | .02 | .04  | .00*             | .00 | .04  |
| <i>Economic Controls:</i>      |                  |     |      |                  |     |      |                  |     |      |                  |     |      |

|                                |         |      |     |        |     |     |         |      |      |        |     |      |
|--------------------------------|---------|------|-----|--------|-----|-----|---------|------|------|--------|-----|------|
| Median Income, 1,000s (2017)\$ | -.01    | .01  | .30 | -.00   | .00 | .30 | .01     | .01  | .13  | .00    | .00 | .13  |
| Unemployment Rate              | .04     | .03  | .20 | .00    | .00 | .20 | .04*    | .02  | .01  | .00*   | .00 | .01  |
| Poverty Rate                   | .00     | .02  | .82 | .00    | .00 | .82 | .04**   | .01  | <.01 | .00**  | .00 | <.01 |
| Physicians per 1,000 Pop.      | .14     | .09  | .15 | .01    | .01 | .14 | .19     | .13  | .14  | .02    | .01 | .14  |
| Constant                       | -5.73** | 2.10 | .01 |        |     |     | -8.31** | 1.47 | <.01 |        |     |      |
| Observations                   | 28,270  |      |     | 28,270 |     |     | 28,270  |      |      | 28,270 |     |      |
| Pseudo R-Squared               | .528    |      |     |        |     |     | .397    |      |      |        |     |      |
| Model Chi-Square               | 724.032 |      |     |        |     |     | 961.033 |      |      |        |     |      |
| Degrees of Freedom             | 30      |      |     |        |     |     | 30      |      |      |        |     |      |

*Source: Authors' analysis of all substance use disorder treatment programs listed in the U.S. Substance Abuse and Mental Health Services Administration's (SAMHSA) National Directory of Drug and Alcohol Abuse Treatment Facilities (derived from the National Survey of Substance Abuse Treatment Services (NSSATS)), 2009-2017.*

*Notes: Progs. = Programs; Coef. = Coefficients; ME - Marginal Effects; Meth. = Methadone; Bup. = Buprenorphine; PDMP = Prescription Drug Monitoring Program; SABG = Substance Abuse Prevention and Treatment Block Grant; Pop. = Population*

*All models conducted in Stata 15 using the logit and margins commands with standard errors clustered at the county-level.*

+ p<0.1, \* p<0.05, \*\* p<0.01

**Appendix Table 7: Coefficients from OLS Regressions Estimating the Relationship between County Opioid Problem Severity and the Log Number of Substance Use Disorder Treatment Programs Available per 100,000 Population (Conditional on Any) and the Log Distance (in Miles) to the Nearest Substance Use Disorder Treatment Program (Conditional on None)**

|                                | Log Number Meth. |     |      | Log Miles Meth.  |     |      | Log Number Bup.  |     |      | Log Miles Bup.   |     |      |
|--------------------------------|------------------|-----|------|------------------|-----|------|------------------|-----|------|------------------|-----|------|
|                                | b                | se  | p    |
| <i>Opioid Severity:</i>        |                  |     |      |                  |     |      |                  |     |      |                  |     |      |
| Low                            | <i>Ref. Cat.</i> |     |      |
| Moderate                       | .01              | .07 | .88  | -.07**           | .02 | <.01 | -.17**           | .05 | <.01 | -.01             | .01 | .53  |
| High                           | .08              | .08 | .33  | -.07**           | .02 | <.01 | -.10+            | .06 | .09  | .00              | .02 | .81  |
| <i>Year Fixed Effects:</i>     |                  |     |      |                  |     |      |                  |     |      |                  |     |      |
| 2009                           | <i>Ref. Cat.</i> |     |      |
| 2010                           | .03              | .02 | .15  | .01**            | .00 | .01  | .10**            | .02 | <.01 | -.07**           | .01 | <.01 |
| 2011                           | -.06             | .06 | .26  | .02              | .02 | .26  | .02              | .05 | .63  | -.12**           | .02 | <.01 |
| 2012                           | -.04             | .06 | .48  | -.03             | .02 | .12  | .06              | .05 | .26  | -.18**           | .02 | <.01 |
| 2013                           | .02              | .07 | .81  | .03              | .03 | .23  | .10+             | .06 | .08  | -.17**           | .03 | <.01 |
| 2014                           | -.01             | .08 | .89  | -.03             | .03 | .40  | .13+             | .07 | .08  | -.28**           | .03 | <.01 |
| 2015                           | -.02             | .09 | .84  | -.01             | .04 | .76  | .16+             | .09 | .07  | -.28**           | .03 | <.01 |
| 2016                           | -.02             | .10 | .83  | .06              | .04 | .14  | .20*             | .10 | .04  | -.26**           | .04 | <.01 |
| 2017                           | -.14             | .11 | .21  | -.27**           | .05 | <.01 | .12              | .10 | .24  | -.43**           | .04 | <.01 |
| <i>State Policy Controls:</i>  |                  |     |      |                  |     |      |                  |     |      |                  |     |      |
| Expanded Medicaid              | -.00             | .05 | .96  | -.01             | .02 | .52  | .03              | .04 | .47  | .07**            | .02 | <.01 |
| Optional PDMP                  | .01              | .05 | .79  | -.15**           | .02 | <.01 | -.03             | .05 | .50  | -.09**           | .02 | <.01 |
| Mandatory PDMP                 | -.13+            | .07 | .06  | .00              | .03 | .93  | .05              | .05 | .36  | -.13**           | .02 | <.01 |
| Pain Clinic Law                | -.21**           | .07 | <.01 | -.16**           | .02 | <.01 | -.37**           | .06 | <.01 | .01              | .02 | .52  |
| Parity Law                     | .17**            | .06 | <.01 | -.01             | .02 | .52  | .15**            | .06 | .01  | .02              | .02 | .27  |
| Naloxone Standing Order        | .12*             | .06 | .04  | -.27**           | .02 | <.01 | -.07             | .05 | .17  | -.20**           | .02 | <.01 |
| SABG Funds Per Capita (2017\$) | .08**            | .02 | <.01 | .22**            | .02 | <.01 | .08**            | .02 | <.01 | .12**            | .01 | <.01 |
| <i>Demographic Controls:</i>   |                  |     |      |                  |     |      |                  |     |      |                  |     |      |
| Population, in 100,000s        | -.01+            | .01 | .07  | -.22**           | .03 | <.01 | -.02**           | .01 | <.01 | -.15**           | .03 | <.01 |
| Percent Rural                  | .02**            | .00 | <.01 | .00**            | .00 | <.01 | .02**            | .00 | <.01 | .00**            | .00 | <.01 |
| Percent White                  | <i>Ref. Cat.</i> |     |      |
| Percent Black                  | .00              | .00 | .98  | -.00**           | .00 | .01  | -.00             | .00 | .34  | .00**            | .00 | .01  |
| Percent Hispanic               | -.01*            | .00 | .02  | .01**            | .00 | <.01 | -.00             | .00 | .88  | .01**            | .00 | <.01 |
| Percent Asian                  | -.01             | .01 | .12  | .03*             | .01 | .04  | -.01             | .01 | .45  | .04*             | .02 | .01  |
| Percent Other Race             | .01              | .01 | .39  | .02**            | .00 | <.01 | .00              | .00 | .75  | .02**            | .00 | <.01 |
| Less Than High School          | <i>Ref. Cat.</i> |     |      |
| High School Graduate/GED       | -.03+            | .02 | .07  | .00              | .00 | .22  | -.01             | .01 | .60  | .01**            | .00 | <.01 |
| Some College/Associate's Deg.  | -.04**           | .01 | <.01 | .04**            | .00 | <.01 | -.00             | .01 | .66  | .03**            | .00 | <.01 |
| Bachelor's Deg. or Higher      | -.03**           | .01 | .01  | .01**            | .00 | <.01 | -.01+            | .01 | .10  | .02**            | .00 | <.01 |

*Economic Controls:*

|                                |        |      |     |         |     |      |        |     |      |        |     |      |
|--------------------------------|--------|------|-----|---------|-----|------|--------|-----|------|--------|-----|------|
| Median Income, 1,000s (2017)\$ | .00    | .00  | .64 | -.02**  | .00 | <.01 | -.00   | .00 | .87  | -.02** | .00 | <.01 |
| Unemployment Rate              | -.02   | .01  | .27 | -.05**  | .00 | <.01 | -.05** | .01 | <.01 | -.03** | .00 | <.01 |
| Poverty Rate                   | .02*   | .01  | .02 | -.01+   | .00 | .07  | .02*   | .01 | .04  | -.00   | .00 | .12  |
| Physicians per 1,000 Pop.      | .02+   | .01  | .09 | -.02    | .02 | .30  | .06**  | .02 | <.01 | -.03+  | .02 | .08  |
| Constant                       | 1.21   | 1.44 | .40 | 2.79**  | .27 | <.01 | -.11   | .91 | .90  | 2.51** | .23 | <.01 |
| Observations                   | 4,099  |      |     | 24,171  |     |      | 6,397  |     |      | 21,873 |     |      |
| R-Squared                      | .544   |      |     | .446    |     |      | .487   |     |      | .368   |     |      |
| F-Statistic                    | 38.916 |      |     | 101.298 |     |      | 45.122 |     |      | 78.925 |     |      |
| Degrees of Freedom             | 564    |      |     | 2,827   |     |      | 1,088  |     |      | 2,733  |     |      |

*Source: Authors' analysis of all substance use disorder treatment programs listed in the U.S. Substance Abuse and Mental Health Services Administration's (SAMHSA) National Directory of Drug and Alcohol Abuse Treatment Facilities (derived from the National Survey of Substance Abuse Treatment Services (NSSATS)), 2009-2017.*

*Notes: Progs. = Programs; Meth. = Methadone; Bup. = Buprenorphine; PDMP = Prescription Drug Monitoring Program; SABG = Substance Abuse Prevention and Treatment Block Grant; Pop. = Population*

*All models conducted in Stata 15 using the regress command with standard errors clustered at the county-level.*

+ p<0.1, \* p<0.05, \*\* p<0.01
